# Supplementary material for: SCFCdc4 ubiquitin ligase regulates synaptonemal complex formation during meiosis
Source: Life Sci Alliance. 2020 Dec 7;4(2):e202000933. doi: 10.26508/lsa.202000933 (PMC7756916; doi:10.26508/lsa.202000933)
Supplement: Supplementary file 1 [file LSA-2020-00933_SdataF1.xlsx]

## Sheet: Fig1B
WT(ZHY9)				CDC53mn(ZHY94)
Time (h)	MI	MII		Time (h)	MI	MII
0	0	0		0	0	0
2	0	0		2	0	0
3	0	0		3	0	0
4	0	0		4	0	0
5	0.0588235	0		5	0	0
6	0.380814	0.0523256		6	0	0
7	0.624454	0.427948		7	0	0
8	0.783898	0.622881		8	0	0
10	0.88125	0.81875		10	0.0049505	0
12	0.925558	0.861042		12	0.015625	0.0104167
24	0.83945	0.527523		24	0	0

## Sheet: Fig1D
WT								CDC53mn
	pro %	met I%	meta II %	ana I %	ana II %			pro %	met I%	meta II %	ana I %	ana II %
0	100	0	0	0	0		0	100	0	0	0	0
3	100	0	0	0	0		3	100	0	0	0	0
4	97.5207	2.47934	0	0	0		4	100	0	0	0	0
5	67.1429	22.8571	2.14286	7.85714	0		5	100	0	0	0	0
6	21.7742	13.7097	25	4.83871	34.6774		6	100	0	0	0	0
8	3.26797	1.30719	7.18954	3.26797	20.915		8	99.3506	0.649351	0	0	0
10	0.684932	0	1.36986	0	2.73973		10	90.0709	9.92908	0	0	0
12	0	0	0	0	0		12	50	39.2857	0	10.7143	0

## Sheet: Fig1F
WT(ZHY9)
Time (h)	dots	short	long
0	0	0	0
2	0.165217	0	0
3	0.314516	0.25	0.0645161
4	0.17	0.19	0.32
5	0.169643	0.321429	0.232143
6	0.131868	0.175824	0.0989011
8	0	0	0.0217391
10
CDC53mn(ZHY94)
Time (h)	dots	short	long
0	0	0	0
2	0.288288	0	0
3	0.333333	0	0
4	0.705426	0.0387597	0
5	0.764228	0.113821	0
6	0.492424	0.477	0
8	0.352601	0.346	0
10	0.113475	0.085	0
12	0.037037	0.081	0

## Sheet: Fig1G
	WT(ZHY9)
	Time (h)	PC	CDC53mn(ZHY94)
	0	0	Time (h)	PC
	2	0.0535714	0	0
	3	0.264463	2	0.0458716
	4	0.19802	3	0.351852
	5	0.221239	4	0.773913
	6	0.146341	5	0.881356
	8	0	6	0.961538
			8	0.764706
			10	0.252252
			12	0.102941

## Sheet: Fig1H
WT(ZHY9)		CDC53mn(ZHY94)
Time (h)	Rad51	Time (h)	Rad51
0	0	0	0
2	0.008	2	0
3	0.7302	3	0.0357
4	0.6634	4	0.5308
5	0.6087	5	0.7951
6	0.4021	6	0.9104
8	0.0217	8	0.5886
		10	0.156
		12	0.1194
