# Supplementary material for: SCFCdc4 ubiquitin ligase regulates synaptonemal complex formation during meiosis
Source: Life Sci Alliance. 2020 Dec 7;4(2):e202000933. doi: 10.26508/lsa.202000933 (PMC7756916; doi:10.26508/lsa.202000933)
Supplement: Supplementary file 4 [file LSA-2020-00933_SdataF4.xlsx]

## Sheet: Fig4B
Hop1
	WT	CDC53mn
	hop1+%	hop1+%
0	0	0
2	8.4507	0
3	47.3684	7.33945
4	83.8095	44.2953
5	85.2217	74.6411
6	72.3757	90.6832
8	17.4089	89.0805
10	1.0582	72.0207
12		28.1106

## Sheet: Fig4E
Wild type-Red1
	Average
Time (h)	I-ave	II-ave	III-Ave		I-SD	II-SD	III-SD
0	0	0	0		0	0	0
2	0.409676	0.0549196	0		0.114174	0.0555532	0
4	0.204583	0.240408	0.398515		0.0519432	0.0830271	0.117911
6	0.0345977	0.0381395	0.0121951		0.0204978	0.0273647	0.0243902
8	0	0	0		0	0	0
Wild type-Rec8
Time (h)	I-ave	II-ave	III-Ave		I-SD	II-SD	III-SD
0	0	0	0		0	0	0
2	0.592151	0.0875685	0		0.119715	0.144688	0
4	0.235158	0.357184	0.268457		0.130818	0.0382136	0.118027
6	0.0331298	0.0366429	0.00914634		0.0275321	0.0298732	0.0182927
8	0.00390625	0	0		0.0078125	0	0
CDC53mn-Red1
Time (h)	I-ave	II-ave	III-Ave		I-SD	II-SD	III-SD
0	0	0	0		0	0	0
2	0.0673496	0.00980392	0		0.0669037	0.0196078	0
4	0.49706	0.22964	0		0.13162	0.14743	0
6	0.324966	0.496101	0		0.124143	0.18624	0
8	0.352427	0.320175	0.0181579		0.0633716	0.138604	0.0248411
10	0.437076	0.179258	0		0.052638	0.112361	0
12	0.455571	0.168448	0		0.1539	0.0596688	0
CDC53mn-Rec8
Time (h)	I-ave	II-ave	III-Ave		I-SD	II-SD	III-SD
0	0	0	0		0	0	0
2	0.712243	0.0484749	0		0.114184	0.0743379	0
4	0.510239	0.393179	0		0.215495	0.21455	0
6	0.410739	0.544747	0		0.246903	0.245617	0
8	0.209444	0.345984	0.0181579		0.165232	0.0967777	0.0248411
10	0.11727	0.18988	0		0.115593	0.128928	0
12	0.0909621	0.122578	0		0.0467207	0.0217446	0

## Sheet: Fig4G
WT	CDC53mn
1.15085	1.25786
1.3499	1.28236
1.22927	0.549747
0.549747	1.03494
0.48074	1.1392
1.22927	1.08525
0.926163	1.14115
0.889444	1.13333
0.565685	0.471405
0.876863	0.835331
0.906765	1.60139
0.632456	0.866667
0.471405	0.894427
0.824621	0.666667
0.954521	0.85375
1.26667	0.669992
1.18134	0.954521
0.843274	1.37437
0.813771	1.03709
0.802773	0.5696
0.466667	0.889444
0.628932	1.19257
0.984321	1.0198
0.869227	1.3233
1.16428	1.13137
0.802773	0.947511
0.991071	0.659966
1.10353	0.666667
0.894427	0.5696
0.549747	0.848528
0.954521	1.28236
1.29443	1.22565
0.686375	0.537484
1.07497	1.03494
0.421637	1.06875
0.802773	1.20185
0.802773	0.947511
0.8	1.18134
0.889444	0.520683
1.34825	0.733333
0.935711	1.56205
0.866667	0.718022
0.686375	1.28236
0.869227	0.549747
0.745356	0.824621
0.96148	1.25786
0.520683	0.928559
0.686375	0.72111
1.09949	0.659966
1	0.96148
0.760117	1.16428
0.876863	1.03494
0.8	0.896908
1.0198	1.03709
1.34825	0.614636
0.843274	1.34825
0.928559	0.718022
1.09949	0.935711
1.00222	0.708677
0.573488	0.614636
0.686375	0.96148
1.42673	0.537484
1.27366	0.632456
0.869227	0.835331
1.0435	0.813771
0.708677	1.20738
1.03709	1.28062
0.869227	0.628932
1.01544	1.42517
1.24007	0.745356
0.708677	1.00422
0.811035	1.11754
1.30979	0.926163
0.866667	0.811035
1.48024	0.745356
0.733333	1.04137
1.22927	0.869227
1.05409	1.08525
1.13137	1.46818
1.09341	1.62207
1.22927	0.628932
0.866667	0.656591
0.708677	1.46211
0.802773	1.53333
1.18134	1.38724
0.894427	0.565685
0.614636	1.28236
0.537484	1.77514
1.16619	1.06667
0.377124	0.984321
0.77746	1.22927
1.04137	1.39204
0.733333	0.926163
0.876863	1.44222
0.6	1.20738
0.942809	1.06875
0.708677	1
0.632456	0.96148
1.03494	0.933333
0.869227	1.16428
1.43914	1.13529
1.37275	0.991071
0.780313	0.669992
0.824621	0.339935
0.6	1.50407
0.802773	0.359011
0.889444	0.659966
0.906765	1.24007
0.565685	1.10955
0.447214	1.43914
1.37437	1.47573
0.869227	0.942809
1.3499	0.754247
0.896908	1.21655
0.954521	1.26842
0.632456	0.686375
0.466667	1.72047
0.628932	0.835331
1.28236	0.760117
0.802773	1.05409
0.628932	1.668
0.889444	0.947511
0.754247	1.64655
1.24007	1.21655
0.603692	0.954521
0.835331	1.05409
0.549747	1.81353
1.16428	1.89502
0.745356	0.805537
1.13529	0.614636
0.466667	1.09341
0.507718	0.935711
0.426875	0.94353
0.72111	0.970681
0.708677	0.679869
0.736357	0.485341
0.628932	1.00222
0.628932	1.24544
0.802773	1.14115
0.339935	1.76509
0.811035	0.8
0.805537	0.869227
0.736357	0.708677
1.14698	0.947511
0.596285	0.933333
1.01544	1.96073
1.20185	1.43604
0.928559	1.20738
1.27366	1.10955
0.603692	0.906765
1.3499	1.46363
0.614636	1.51144
0.485341	0.754247
0.970681	1.12923
0.6	1.16619
1	0.869227
0.928559	1.77514
1.25255	1.61245
1.22927	1.74992
1.16428	1.52023
1.07497	1.48024
1.09949	1.69706
1.19257	1.60139
1.16428	1.18134
1.1392	1.49071
1.22384	1.58465
