# Supplementary material for: SCFCdc4 ubiquitin ligase regulates synaptonemal complex formation during meiosis
Source: Life Sci Alliance. 2020 Dec 7;4(2):e202000933. doi: 10.26508/lsa.202000933 (PMC7756916; doi:10.26508/lsa.202000933)
Supplement: Supplementary file 5 [file LSA-2020-00933_SdataF5.xlsx]

## Sheet: Fig5C
WT(ZHy9)					CDC53mn(ZHY94)					pch2 (ZHY350)					pxh2 CDC53mn (ZHY351)
	% of I	% of II	% of III			% of I	% of II	% of III			% of I	% of II	% of III			% of I	% of II	% of III
0	0	0	0		0	0	0	0		0	0	0	0		0	0	0	0
2	0.605263	0	0		2	0.267857	0	0		2	0.287037	0	0		2	0.452381	0	0
3	0.386667	0.213333	0		4	0.827869	0.0901639	0		3	0.405063	0.132911	0.0126582		4	0.855932	0.059322	0
4	0.147059	0.220588	0.441176		6	0.787671	0.0205479	0		4	0.0946746	0.142012	0.550296		6	0.0382514	0.289617	0.650273
6	0.0598291	0.162393	0.0769231		8	0.442623	0.0491803	0		6	0.110553	0.150754	0.326633		8	0	0.0205479	0.917808
8	0.0384615	0	0		10	0.223776	0.0839161	0.00699301		8	0.059322	0	0.00847458		10	0.0128205	0.0384615	0.910256
															12	0.0268456	0.0268456	0.892617

## Sheet: Fig5D
Poly compex
WT(ZHy9)			CDC53mn(ZHY94)			pch2 (ZHY350)			pxh2 CDC53mn (ZHY351)
0	0		0	0		0	0		0	0
2	0.0921053		2	0.0535714		2	0.0277778		2	0.0714286
3	0.28		4	0.852459		3	0.0949367		4	0.90678
4	0.338235		6	0.815068		4	0.0177515		6	0.240437
6	0.102564		8	0.469945		6	0.0150754		8	0.0616438
8	0		10	0.286713		8	0.00847458		10	0.0384615
									12	0.0402685
